# Supplementary material
Source: PubMed Central journal article supplement (PMC5697953)
Supplement: DB170666SupplementaryData.pdf [file DB170666SupplementaryData.pdf]

SUPPLEMENTARY DATA

**Supplementary Table 1.** Study participant demographic, tetramer, and autoantibody data (ex vivo samples)

| Sample   | Diabetes Status | Age (years) | T1D duration (years) <sup>§</sup> | Gender | # InsB tetramer <sup>+</sup> cells | # CD4 <sup>+</sup> T cells (X 10 <sup>6</sup> ) | # CD4 <sup>+</sup> T cells/<br>Tetramer <sup>+</sup> cells | % T <sub>EM</sub> | % T <sub>CM</sub> | % T <sub>naive</sub> | mIAA+  | GAD AA+ | IA-2 AA+ | ZnT8 AA+ | blood volume (mL) | Total # of PBMCs (X10 <sup>6</sup> ) |
|----------|-----------------|-------------|-----------------------------------|--------|------------------------------------|-------------------------------------------------|------------------------------------------------------------|-------------------|-------------------|----------------------|--------|---------|----------|----------|-------------------|--------------------------------------|
|          |                 |             |                                   |        |                                    |                                                 |                                                            |                   |                   |                      |        |         |          |          |                   |                                      |
| ExVivo1  | New onset       | 3           | 0.10                              | M      | 16                                 | 12.75                                           | 0.79                                                       | 0                 | 0                 | 100                  | 0.049  | 193     | 314      | 0.121    | 22.5              | 60.2                                 |
| ExVivo2  | New onset       | 11          | 0 (0 days) <sup>§</sup>           | M      | 14                                 | 26.89                                           | 1.96                                                       | 0                 | 75                | 25                   | N/A    | N/A     | N/A      | N/A      | 37.5              | 81.3                                 |
| ExVivo3  | New onset       | 22          | 0 (0 days) <sup>§</sup>           | F      | 12                                 | 14.77                                           | 1.22                                                       | 0                 | 50                | 50                   | N/A    | N/A     | N/A      | N/A      | 45                | 86.4                                 |
| ExVivo4  | New onset       | 18          | 0.10                              | M      | 7                                  | 16.82                                           | 2.38                                                       | 0                 | 50                | 50                   | 0.017  | 443     | 361      | 0.428    | 24.5              | 64                                   |
| ExVivo5  | New onset       | 16          | 0 (2 days) <sup>§</sup>           | M      | 6                                  | 67.66                                           | 11.50                                                      | 0                 | 100               | 0                    | -0.001 | 0       | 366      | 0.150    | 51                | 110                                  |
| ExVivo6  | New onset       | 14          | 0 (3 days) <sup>§</sup>           | M      | 0                                  | 6.82                                            | 0                                                          |                   |                   |                      | 0.000  | 14      | 168      | 0.109    | 36.5              | 25                                   |
| ExVivo7  | T1D             | 3           | 1.70                              | M      | 21                                 | 16.81                                           | 0.80                                                       | 66.7              | 16.7              | 16.7                 | 2.466  | 37      | 83       | 0.014    | 25                | 99.6                                 |
| ExVivo8  | T1D             | 5           | 1.70                              | F      | 15                                 | 23.40                                           | 1.55                                                       | 33.3              | 66.7              | 0                    | 0.682  | 31      | 1        | -0.001   | 26                | 71                                   |
| ExVivo9  | T1D             | 12          | 0.50                              | F      | 13                                 | 24.36                                           | 1.89                                                       | 0                 | 100               | 0                    | 0.325  | 37      | 0        | 0.003    | 49                | 99.6                                 |
| ExVivo10 | T1D             | 9           | 4.70                              | M      | 12                                 | 9.88                                            | 0.82                                                       | 0                 | 33.3              | 66.7                 | 2.759  | 0       | 2        | -0.001   | 17                | 57.8                                 |
| ExVivo11 | T1D             | 44          | 25.00                             | F      | 10                                 | 49.14                                           | 5.17                                                       | 33.3              | 66.6              | 0                    | 3.220  | 0       | 0        | 0.002    | 49                | 130                                  |
| ExVivo12 | T1D             | 23          | 14.00                             | F      | 9                                  | 12.62                                           | 1.40                                                       | 100               | 0                 | 0                    | 1.824  | 320     | 68       | 0.005    | 32                | 69.5                                 |
| ExVivo13 | T1D             | 10          | 1.00                              | F      | 8                                  | 14.20                                           | 1.78                                                       | 100               | 0                 | 0                    | 4.009  | 693     | 365      | 0.026    | 32                | 50.7                                 |
| ExVivo14 | T1D             | 51          | 48.00                             | M      | 7                                  | 27.98                                           | 4.16                                                       | 66.6              | 33.3              | 0                    | 1.082  | 0       | 0        | 0.000    | 48                | 94                                   |
| ExVivo15 | T1D             | 6           | 3.00                              | M      | 6                                  | 22.91                                           | 3.80                                                       | 0                 | 0                 | 100                  | 0.119  | 37      | 40       | 0.010    | 23.5              | 63                                   |
| ExVivo16 | T1D             | 16          | 0.50                              | F      | 6                                  | 10.79                                           | 1.79                                                       | 100               | 0                 | 0                    | 0.450  | 607     | 277      | 0.318    | 35                | 61                                   |
| ExVivo17 | T1D             | 50          | 37.00                             | F      | 4                                  | 27.77                                           | 6.52                                                       | 0                 | 0                 | 100                  | N/A    | N/A     | N/A      | N/A      | 52.5              | 85.5                                 |
| ExVivo18 | T1D             | 38          | 35.00                             | M      | 4                                  | 29.36                                           | 7.89                                                       | 0                 | 0                 | 100                  | 1.829  | 13      | 10       | 0.003    | 43                | 94                                   |
| ExVivo19 | T1D             | 49          | 21.00                             | F      | 3                                  | 22.30                                           | 6.68                                                       | 0                 | 0                 | 100                  | N/A    | N/A     | N/A      | N/A      | 55                | 70                                   |
| ExVivo20 | T1D             | 35          | 29.00                             | F      | 3                                  | 25.72                                           | 8.69                                                       | 0                 | 0                 | 100                  | 0.003  | 0       | 0        | 0.004    | 55                | 145                                  |
| ExVivo21 | T1D             | 15          | 1.80                              | M      | 3                                  | 23.61                                           | 8.99                                                       | 0                 | 0                 | 100                  | 1.271  | 113     | 145      | 0.102    | 38                | 70                                   |
| ExVivo22 | T1D             | 4           | 3.00                              | M      | 0                                  | 9.93                                            | 0                                                          |                   |                   |                      | 0.285  | 751     | 10       | 0.156    | 12.5              | 32.1                                 |
| ExVivo23 | T1D             | 10          | 3.00                              | F      | 0                                  | 4.46                                            | 0                                                          |                   |                   |                      | 0.072  | 4       | 0        | 0.006    | 16                | 36.3                                 |
| ExVivo24 | T1D             | 10          | 3.00                              | F      | 0                                  | 32.68                                           | 0                                                          |                   |                   |                      | 0.064  | 11      | 0        | -0.002   | 42                | 66                                   |
| ExVivo25 | T1D             | 11          | 3.00                              | F      | 0                                  | 8.64                                            | 0                                                          |                   |                   |                      | 0.257  | 0       | 58       | 0.009    | 52                | 57                                   |
| ExVivo26 | T1D             | 38          | 25.00                             | F      | 0                                  | 19.69                                           | 0                                                          |                   |                   |                      | 0.018  | 134     | 0        | 0.008    | 43                | 80.6                                 |
| ExVivo27 | T1D             | 47          | 33.00                             | F      | 0                                  | 24.74                                           | 0                                                          |                   |                   |                      | 0.180  | 0       | 22       | -0.002   | 55.5              | 83.6                                 |
| ExVivo28 | T1D             | 35          | 31.00                             | F      | 0                                  | 27.83                                           | 0                                                          |                   |                   |                      | -0.001 | 12      | 0        | 0.000    | 51                | 77                                   |
| ExVivo29 | T1D             | 39          | 15.00                             | F      | 0                                  | 31.46                                           | 0                                                          |                   |                   |                      | 0.145  | 112     | 100      | 0.037    | 54                | 100                                  |
| ExVivo30 | T1D             | 58          | 43.00                             | M      | 0                                  | 35.43                                           | 0                                                          |                   |                   |                      | 0.011  | 41      | 2        | 0.002    | 54                | 146                                  |
| ExVivo31 | T1D             | 61          | 0.50                              | M      | 0                                  | 16.94                                           | 0                                                          |                   |                   |                      | 0.011  | 114     | 445      | 0.077    | 55                | 69                                   |
| ExVivo32 | T1D             | 50          | 41.00                             | F      | 0                                  | 24.35                                           | 0                                                          |                   |                   |                      | 3.017  | 33      | 8        | 0.004    | 32                | 98                                   |
| ExVivo33 | T1D             | 30          | 13.50                             | M      | 0                                  | 35.33                                           | 0                                                          |                   |                   |                      | 0.007  | 0       | 2        | 0.005    | 54                | 99                                   |
| ExVivo34 | T1D             | 67          | 41.00                             | F      | 0                                  | 9.04                                            | 0                                                          |                   |                   |                      | 2.906  | 14      | 58       | 0.000    | 14                | 33                                   |
| ExVivo35 | T1D             | 60          | 36.00                             | M      | 0                                  | 8.16                                            | 0                                                          |                   |                   |                      | 0.002  | 1       | 0        | -0.001   | 21                | 31                                   |
| ExVivo36 | T1D             | 57          | 55.00                             | M      | 0                                  | 31.17                                           | 0                                                          |                   |                   |                      | 0.882  | 0       | 0        | -0.002   | 51                | 93                                   |
| ExVivo37 | T1D             | 19          | 17.00                             | F      | 0                                  | 44.25                                           | 0                                                          |                   |                   |                      | 0.089  | 0       | 93       | -0.001   | 54                | 96                                   |

SUPPLEMENTARY DATA

| Sample   | Diabetes Status        | Age (years) | T1D duration (years <sup>&amp;</sup> ) | Gender | # InsB tetramer <sup>+</sup> cells | # CD4 <sup>+</sup> T cells (X 10 <sup>6</sup> ) | # CD4 <sup>+</sup> T cells/ Tetramer <sup>+</sup> cells (X 10 <sup>6</sup> ) | % T <sub>EM</sub> | % T <sub>CM</sub> | mIAA+  | GAD AA+ | IA-2 AA+ | ZnT8 AA+ | blood volume (mL) | Total # of PBMCs (X10 <sup>6</sup> ) |
|----------|------------------------|-------------|----------------------------------------|--------|------------------------------------|-------------------------------------------------|------------------------------------------------------------------------------|-------------------|-------------------|--------|---------|----------|----------|-------------------|--------------------------------------|
| ExVivo38 | Non-diabetic (At-risk) | 3           |                                        | F      | 2                                  | 19.91                                           | 9.96                                                                         | 100               | 0                 | 0.002  | 0       | 0        | -0.001   | 26                | 58                                   |
| ExVivo39 | Non-diabetic (At-risk) | 11          |                                        | F      | 0                                  | 35.67                                           | 0                                                                            |                   |                   | -0.006 | 617     | 41       | 0.015    | 46.5              | 126                                  |
| ExVivo40 | Non-diabetic           | 12          |                                        | F      | 5                                  | 37.83                                           | 7.57                                                                         | 0                 | 0                 | -0.001 | 0       | 0        | 0.000    | 28                | 55.7                                 |
| ExVivo41 | Non-diabetic           | 46          |                                        | F      | 4                                  | 44.66                                           | 11.16                                                                        | 0                 | 0                 | -0.003 | 0       | 0        | -0.002   | 52                | 112                                  |
| ExVivo42 | Non-diabetic           | 25          |                                        | M      | 3                                  | 22.53                                           | 7.51                                                                         | 0                 | 0                 | 0.002  | 0       | 0        | -0.001   | 44                | 135                                  |
| ExVivo43 | Non-diabetic           | 45          |                                        | F      | 0                                  | 28.83                                           | 0                                                                            |                   |                   | -0.002 | 0       | 0        | 0.001    | 54                | 117                                  |
| ExVivo44 | Non-diabetic           | 39          |                                        | F      | 0                                  | 49.87                                           | 0                                                                            |                   |                   | -0.001 | 0       | 0        | 0.002    | 46                | 160                                  |
| ExVivo45 | Non-diabetic           | 36          |                                        | F      | 0                                  | 23.23                                           | 0                                                                            |                   |                   | -0.002 | 0       | 0        | -0.001   | 57                | 116.5                                |
| ExVivo46 | Non-diabetic           | 18          |                                        | M      | 0                                  | 30.77                                           | 0                                                                            |                   |                   | -0.008 | 0       | 0        | -0.001   | 51.5              | 110                                  |
| ExVivo47 | Non-diabetic           | 43          |                                        | M      | 0                                  | 12.49                                           | 0                                                                            |                   |                   | 0.002  | 11      | 0        | -0.001   | 55.5              | 153                                  |
| ExVivo48 | Non-diabetic           | 10          |                                        | F      | 0                                  | 18.76                                           | 0                                                                            |                   |                   | -0.005 | 0       | 0        | 0.000    | 35.6              | 77.5                                 |
| ExVivo49 | Non-diabetic           | 17          |                                        | F      | 0                                  | 64.04                                           | 0                                                                            |                   |                   | -0.001 | 0       | 0        | 0.002    | 40                | 111.6                                |
| ExVivo50 | Non-diabetic           | 48          |                                        | F      | 0                                  | 23.39                                           | 0                                                                            |                   |                   | -0.010 | 0       | 1        | 0.000    | 41                | 91.5                                 |
| ExVivo51 | Non-diabetic           | 19          |                                        | F      | 0                                  | 2.97                                            | 0                                                                            |                   |                   | -0.001 | 0       | 0        | -0.001   | 26.5              | 27                                   |
| ExVivo52 | Non-diabetic           | 49          |                                        | M      | 0                                  | 11.86                                           | 0                                                                            |                   |                   | 0.001  | 0       | 1        | 0.000    | 42.5              | 69.6                                 |
| ExVivo53 | Non-diabetic           | 33          |                                        | F      | 0                                  | 17.67                                           | 0                                                                            |                   |                   | -0.001 | 1       | 0        | -0.001   | 54.9              | 91.5                                 |
| ExVivo54 | Non-diabetic           | 45          |                                        | F      | 0                                  | 19.37                                           | 0                                                                            |                   |                   | -0.003 | 0       | 0        | -0.002   | 53.5              | 93                                   |
| ExVivo55 | Non-diabetic           | 13          |                                        | F      | 0                                  | 15.84                                           | 0                                                                            |                   |                   | 0.000  | 0       | 0        | 0.000    | 38.5              | 78.5                                 |
| ExVivo56 | Non-diabetic           | 39          |                                        | F      | 0                                  | 38.42                                           | 0                                                                            |                   |                   | 0.041  | 0       | 0        | -0.002   | 52                | 97.5                                 |
| ExVivo57 | Non-diabetic           | 63          |                                        | M      | 0                                  | 42.16                                           | 0                                                                            |                   |                   | 0.005  | 14      | 0        | -0.001   | 54                | 94                                   |
| ExVivo58 | Non-diabetic           | 62          |                                        | F      | 0                                  | 19.75                                           | 0                                                                            |                   |                   | -0.005 | 0       | 0        | -0.002   | 52.5              | 94                                   |
| ExVivo59 | Non-diabetic           | 36          |                                        | M      | 0                                  | 42.16                                           | 0                                                                            |                   |                   | 0.000  | 0       | 0        | -0.002   | 54                | 121                                  |
| ExVivo60 | Non-diabetic           | 58          |                                        | F      | 0                                  | 23.67                                           | 0                                                                            |                   |                   | 0.002  | 0       | 0        | -0.002   | 49                | 108                                  |
| ExVivo61 | Non-diabetic           | 27          |                                        | F      | 0                                  | 25.93                                           | 0                                                                            |                   |                   | N/A    | N/A     | N/A      | N/A      | 47                | 123                                  |
| ExVivo62 | Non-diabetic           | 21          |                                        | F      | 0                                  | 30.06                                           | 0                                                                            |                   |                   | 0.003  | 0       | 0        | -0.003   | 31                | 83                                   |
| ExVivo63 | Non-diabetic           | 58          |                                        | F      | 0                                  | 46.23                                           | 0                                                                            |                   |                   | -0.006 | 0       | 0        | 0.000    | 54                | 125                                  |

\* cut-off for mIAA=0.01, GAD AA=20, IA-2 AA=5, ZnT8 AA=0.02

& T1D duration in years unless listed in days as indicated for newly diagnosed

N/D=not determined

N/A=not available

New onset (within 100 days of T1D diagnosis)

SUPPLEMENTARY DATA

**Supplementary Table 2.** Study participant demographic, tetramer, and autoantibody data (*in vitro* samples)

| Sample           | Diabetes Status | T1D            |                    | Gender | # PBMCs<br>(X 10 <sup>6</sup> ) | %InsB <sub>10-23</sub>                               | %HA <sub>306-318</sub>                               |       |         |          |          |      |      |      |      |      |      |
|------------------|-----------------|----------------|--------------------|--------|---------------------------------|------------------------------------------------------|------------------------------------------------------|-------|---------|----------|----------|------|------|------|------|------|------|
|                  |                 | Age<br>(years) | duration<br>(Days) |        |                                 | tetramer <sup>+</sup> of<br>CD4 <sup>+</sup> T cells | tetramer <sup>+</sup> of<br>CD4 <sup>+</sup> T cells | mIAA* | GAD AA* | IA-2 AA* | ZnT8 AA* | DR1  | DQA1 | DQB1 | DR2  | DQA1 | DQB2 |
| new onset T1D #1 | New onset       | 8              | 8                  | F      | 9.1                             | 0.009                                                | 0.32                                                 | 0.07  | 212     | 239      | 0.001    | 0301 | 0501 | 0201 | 0401 | 0301 | 0302 |
| new onset T1D #2 | New onset       | 13             | 10                 | M      | 12.8                            | 0.081                                                | 0.01                                                 | 0.14  | 113     | 334      | 0.448    | 0301 | 0501 | 0201 | 0405 | 0303 | 0302 |
| new onset T1D #3 | New onset       | 5              | 13                 | M      | 11.6                            | 0                                                    | 0.00                                                 | 0.41  | 0       | 312      | 0.398    | 0405 | 0301 | 0302 | 1301 | 0103 | 0603 |
| new onset T1D #4 | New onset       | 10             | 8                  | F      | 10.2                            | 0.001                                                | 9.21                                                 | 0.02  | 185     | 12       | -0.003   | 0301 | 0501 | 0201 | 0401 | 0301 | 0302 |
| new onset T1D #5 | New onset       | 11             | 15                 | M      | 10.3                            | 0.001                                                | 7.07                                                 | 0.23  | 642     | 267      | 0.84     | 0101 | 0101 | 0501 | 0401 | 0301 | 0302 |

\* cut-off for mIAA=0.01, GAD AA=20, IA-2 AA=5, ZnT8 AA=0.02

SUPPLEMENTARY DATA

**Supplementary Table 3.** Primer and probes used for HLA typing.

| Identifier | Primer/Probe           | Final Concentration | Sequence (5'-3')           |
|------------|------------------------|---------------------|----------------------------|
| GDR1       | DRA Forward Primer     | 225 nM              | AGGCCGAGTTCTATCTGAATCCT    |
| GDR2       | DRA Reverse Primer     | 225 nM              | CGCCAGACCGTCTCCTTCT        |
| GDR3       | DRA Probe              | 50 nM               | VIC-CATAAACTCGCCTGATTG-MGB |
|            |                        |                     |                            |
| GDR4       | Pan DR4 Forward Primer | 225 nM              | CGTTTCTTGGAGCAGGTTAAACA    |
| GDR5       | Pan DR4 Reverse Primer | 225 nM              | GCACGTACTCCTCTTGGTGATAGA   |
| GDR6       | DR4 Probe              | 50 nM               | FAM-TCCGTCCCGTTGAAGA-MGB   |
|            |                        |                     |                            |
| GDQ1       | DQB Forward 132        | 225 nM              | GGGCATGTGCTACTTCACCAA      |
| GDQ2       | DQB Reverse 209        | 225 nM              | GCGTACTCCTCTCGGTTATAGATGT  |
| GDQ3       | DQB 167 Probe 1        | 50 nM               | FAM-TGCGTCTTGTGACCAG-MGB   |
| GDQ4       | DQB 167 Probe 2        | 50 nM               | VIC-TGCGTCTTGTACCAG-MGB    |
|            |                        |                     |                            |
| GDQ5       | DQB Forward 155        | 225 nM              | GGACGGAGCGCGTGCGTCTT       |
| GDQ6       | DQB Reverse 294        | 225 nM              | TTCCTTCTGGCTGTTCCAGTACT    |
| GDQ7       | DQB 245 Probe 1        | 50 nM               | FAM-ACCGCGCGGTACA-MGB      |
| GDQ8       | DQB 246 Probe 2        | 50 nM               | VIC-CACCGCCCGATAC-MGB      |
|            |                        |                     |                            |
| GDR7       | DR4 Subtyping Forward  | 225 nM              | CGTTTCTTGGAGCAGGTTAAACA    |
| GDR8       | DR4 Subtyping Reverse  | 225 nM              | CTCGCCGCTGCACTGTG          |
| GDR9       | DRB codon 57-gat Probe | 50 nM               | FAM-CAGTACTCGGCATCAG-MGB   |
| GDR10      | DRB codon 57-agc Probe | 50 nM               | VIC-ACTCGGCGCTAGG-MGB      |
| GDR11      | DRB codon 71-aag Probe | 50 nM               | FAM-AGCAGAAGCGGGC-MGB      |
| GDR12      | DRB codon 71-agg Probe | 50 nM               | VIC-TGGAGCAGAGGCG-MGB      |
| GDR13      | DRB codon 71-gag Probe | 50 nM               | FAM-GAAGACGAGCGGGC-MGB     |
| GDR14      | DRB codon 74-gcg Probe | 25 nM               | FAM-TGTCCACCGCGGC-MGB      |
| GDR15      | DRB codon 74-gag Probe | 100 nM              | VIC-TGTCCACCTCGGC-MGB      |
| GDR16      | DRB codon 86-ggt Probe | 50 nM               | FAM-AAGCTCTACCAACC-MGB     |
| GDR17      | DRB codon 86-gtg Probe | 50 nM               | VIC-AAGCTCTCACAACC-MGB     |
|            |                        |                     |                            |
| GDQ9       | *03 Forward            | 225 nM              | TAACCGAGAGGAGTACGCACGCT    |
| GDQ10      | *03 Reverse            | 225 nM              | GTGTCTGCACACCGTGTCCAACCT   |
| GDQ11      | *0302                  | 25 nM               | FAM-ACTCGGCGGCAGGC-MGB     |
| GDQ12      | *0303                  | 50 nM               | VIC-ACTCGGCGTCAGGC-MGB     |
| GDQ13      | *0301                  | 50 nM               | FAM-CCGGTACACCTCCACGT-MGB  |

SUPPLEMENTARY DATA

**Supplementary Table 4.** Antibodies used for cell staining and flow cytometry

| Antigen                      | Target species | Clone    | Fluorochrome | Manufacturer     |
|------------------------------|----------------|----------|--------------|------------------|
| CD4                          | Human          | SK3      | BUV395       | BD Biosciences   |
| ICOS                         | Human          | DX29     | BV711        |                  |
| CD8 $\alpha$                 | Human          | RPA-T8   | BV605        | BioLegend        |
| CD45RO                       | Human          | UCHL1    | BV650        |                  |
| CCR7                         | Human          | G043H7   | FITC         |                  |
| CXCR3                        | Human          | G025H7   | PerCp/Cy5.5  |                  |
| PD-1                         | Human          | EH12.2H7 | BV786        |                  |
| Human TruStain FcX (CD16/32) | Human          |          |              |                  |
| CD3                          | Human          | SK7      | APC-ef780    | eBioscience      |
| CD20                         | Human          | 2H7      | PE-Cy7       |                  |
| CD33                         | Human          | WM-53    | PE-Cy7       |                  |
| CD123                        | Human          | 6H6      | PE-Cy7       |                  |
| Ghost violet 510             |                |          |              | Tonbo bioscience |
| B220                         | Mouse          | RA3-6B2  | FITC         | BD Biosciences   |
| CD3 $\square$                | Mouse          | 145-2C11 | BUV395       |                  |
| CD8 $\alpha$                 | Mouse          | 53-6.7   | PerCp/Cy5.5  |                  |
| CD11b                        | Mouse          | M1/70    | FITC         |                  |
| CD11c                        | Mouse          | N418     | FITC         |                  |
| CD44                         | Mouse          | 1M7      | BV786        |                  |
| CD4                          | Mouse          | RM4-5    | APC-ef780    | eBioscience      |
| PD-1                         | Mouse          | J43      | PE-Cy7       |                  |
